# Supplementary material for: Antimicrobial, Cytotoxic, and Anti-Inflammatory Activities of Tigridia vanhouttei Extracts
Source: MDPI journal article supplement (doi:10.3390/plants12173136), 2023-08-31

# Antimicrobial, Cytotoxic, and Anti-inflammatory Activities of *Tigridia vanhouttei* Extracts

Jorge L. Mejía-Méndez<sup>1,†,\*</sup>, Ana C. Lorenzo-Leal<sup>2,†</sup>, Horacio Bach<sup>2,†,\*</sup>, Edgar R. López-Mena<sup>3</sup>, Diego E. Navarro-López<sup>3</sup>, Luis R. Hernández<sup>1</sup>, Zaida N. Juárez<sup>4</sup>, Eugenio Sánchez-Arreola<sup>1,\*</sup>

<sup>1</sup> Laboratory of Phytochemistry Research, Chemical Biological Sciences Department, Universidad de las Américas Puebla, Ex Hacienda Sta. Catarina Mártir S/N, San Andrés Cholula 72810, Mexico; luisr.hernandez@udlap.mx (L.R.H.).

<sup>2</sup> Division of Infectious Diseases, Faculty of Medicine, University of British Columbia, Vancouver, BC V6H 3Z6, Canada; anacecylole@gmail.com (A.C.L.-L.).

<sup>3</sup> Tecnológico de Monterrey, Escuela de Ingeniería y Ciencias, Campus Guadalajara, Av. Gral. Ramón Corona No 2514, Colonia Nuevo México, Zapopan 45121, Jalisco, Mexico; edgarl@tec.mx (E.R.L.-M.); diegonl@tec.mx (D.E.N.-L.).

<sup>4</sup> Chemistry Area, Deanship of Biological Sciences, Universidad Popular Autónoma del Estado de Puebla, 21 Sur 1103 Barrio Santiago, Puebla 72410, Mexico; zaidanelly.juarez@upaep.mx (Z.N.J.).

<sup>†</sup> These authors contributed equally to this work.

\* Correspondence: jorge.mejiamz@udlap.mx (J.L.M.-M.); hbach@mail.ubc.ca (H.B.); eugenio.sanchez@udlap.mx (E.S.-A.).

Figure S1. Chromatogram of hexane extract from *T. vanhouttei*.

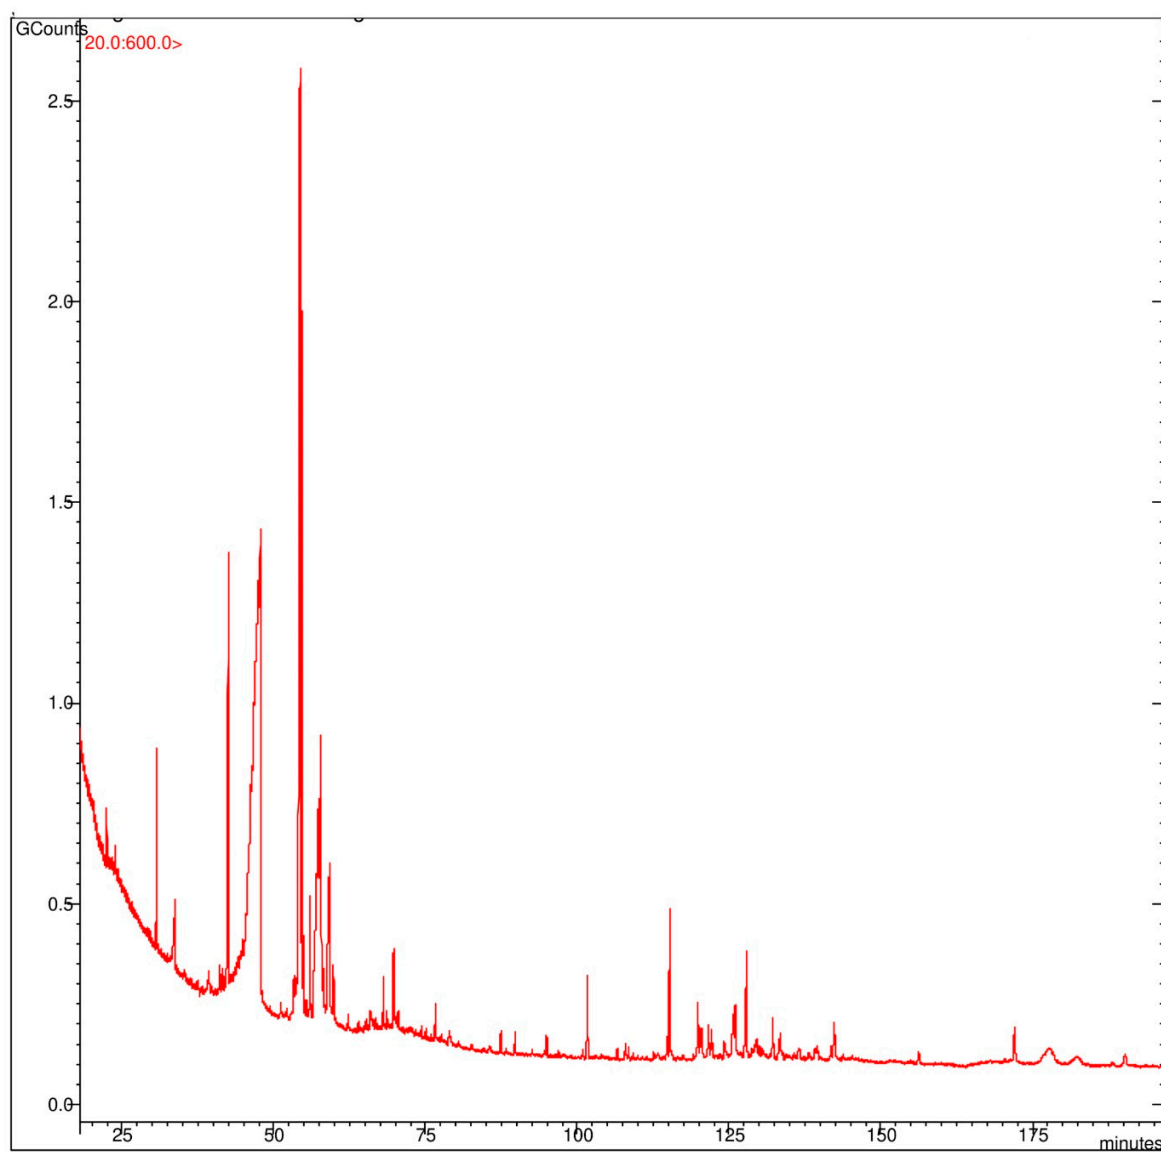

Figure S2. Chromatogram of chloroform extract from *T. vanhouttei*.

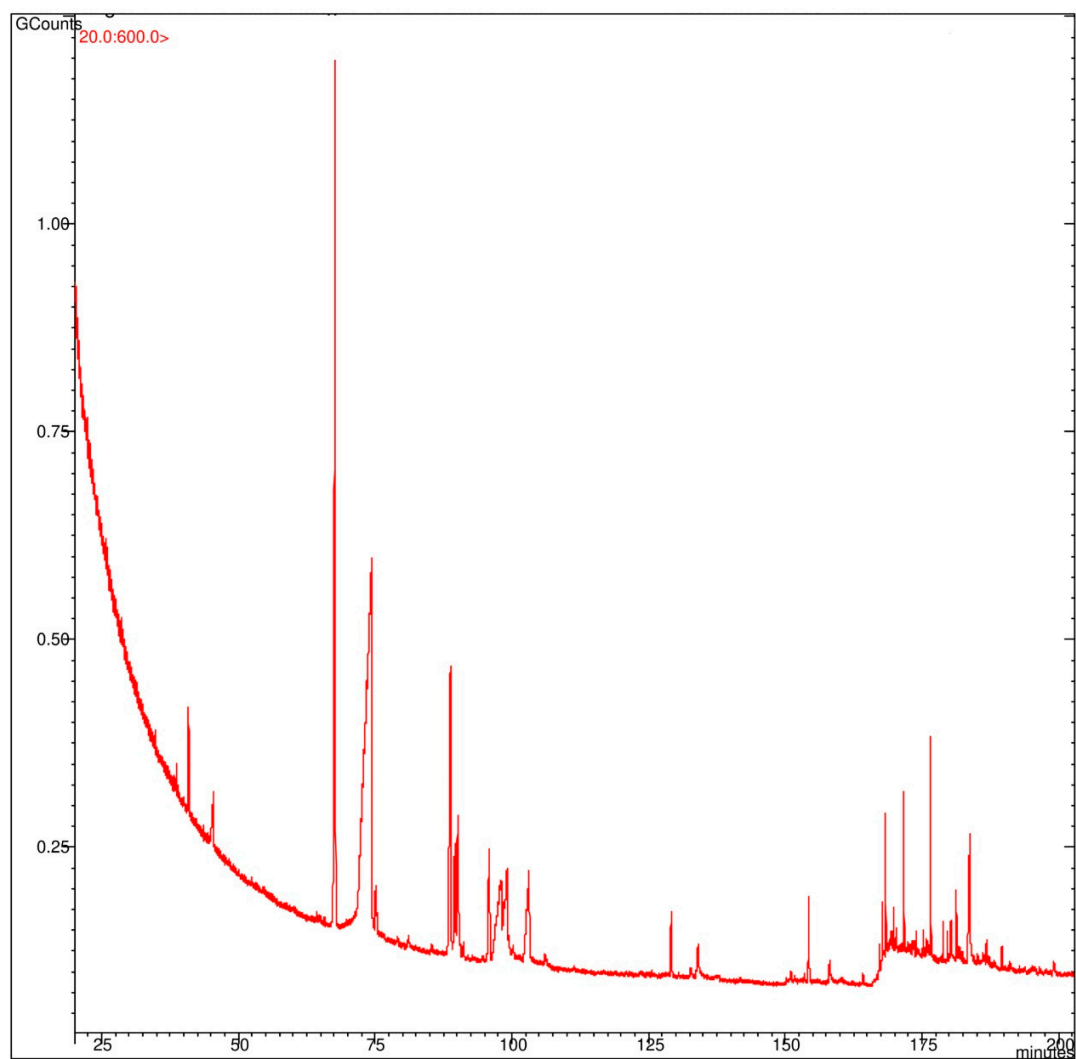

Figure S3. Chromatogram of methanol extract from *T. vanhouttei*.

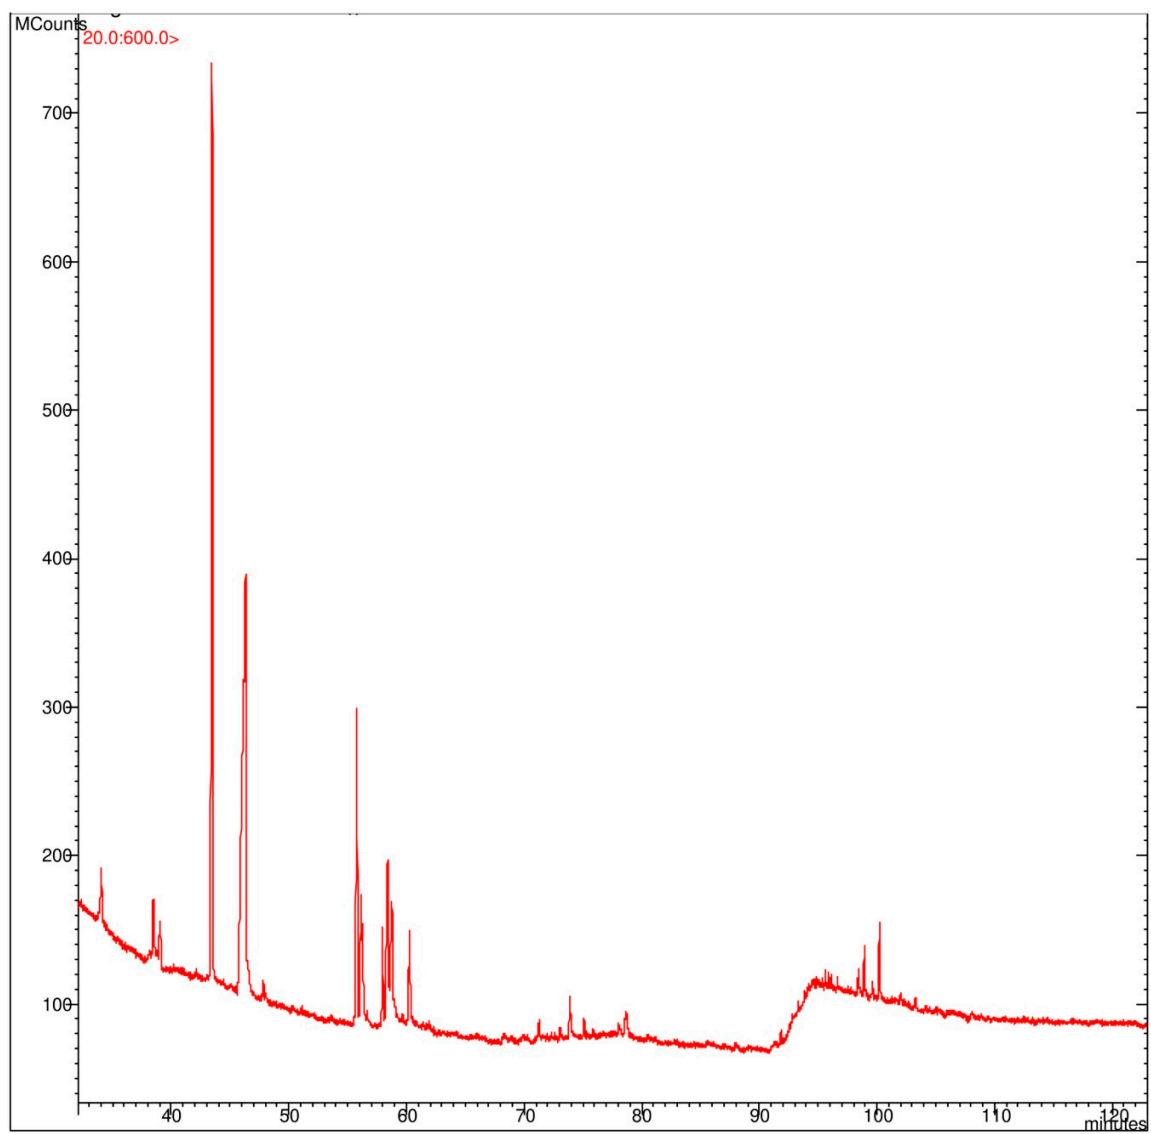

Supplement: s1 [file s1]
